# Supplementary material
Source: PubMed Central journal article supplement (PMC3129594)

1  
2  
3  
4  
5 Figure legends  
6  
7  
8  
9

10 Figure 1. A. Expression of IHH in endometrium of women with endometriosis (patient) or healthy  
11 volunteers (normal) in the nuclei (Nuc) of the glandular (Gld) or stromal (Stroma) compartments.  
12

13 Except for the early secretory phase stroma, all secretory phase patient values were  
14 significantly different from the corresponding menstrual phase and tissue result in healthy  
15 volunteers. LP = late proliferative, ES = early secretory, MS = mid-secretory, LS = late secretory  
16  
17  
18

19 B. Expression of IHH in endometrium of women with endometriosis (patient) or healthy  
20  
21

22 volunteers (normal) in the cytoplasm (Cyto) of the glandular (Gld) or stromal (Stroma)  
23 compartments. All secretory phase patient values were significantly different from the  
24 corresponding menstrual phase and tissue result in healthy volunteers. ES = early secretory,  
25  
26  
27  
28  
29  
30 MS = mid-secretory, LS = late secretory.  
31

32 Figure 1, Supplemental Data. Representative results of Indian Hedgehog staining by  
33 immunohistochemistry in endometrium of healthy volunteers (N) or women with endometriosis  
34 (P) in the late proliferative (LP), early secretory (ES), mid-secretory (MS) or late secretory (LS)  
35  
36  
37  
38  
39 phase of the menstrual cycle. Brown staining indicates a positive result.  
40  
41  
42  
43  
44  
45  
46  
47  
48  
49  
50  
51  
52  
53  
54  
55  
56  
57  
58  
59  
60  
61  
62  
63  
64  
65

[Click here to download high resolution image](#)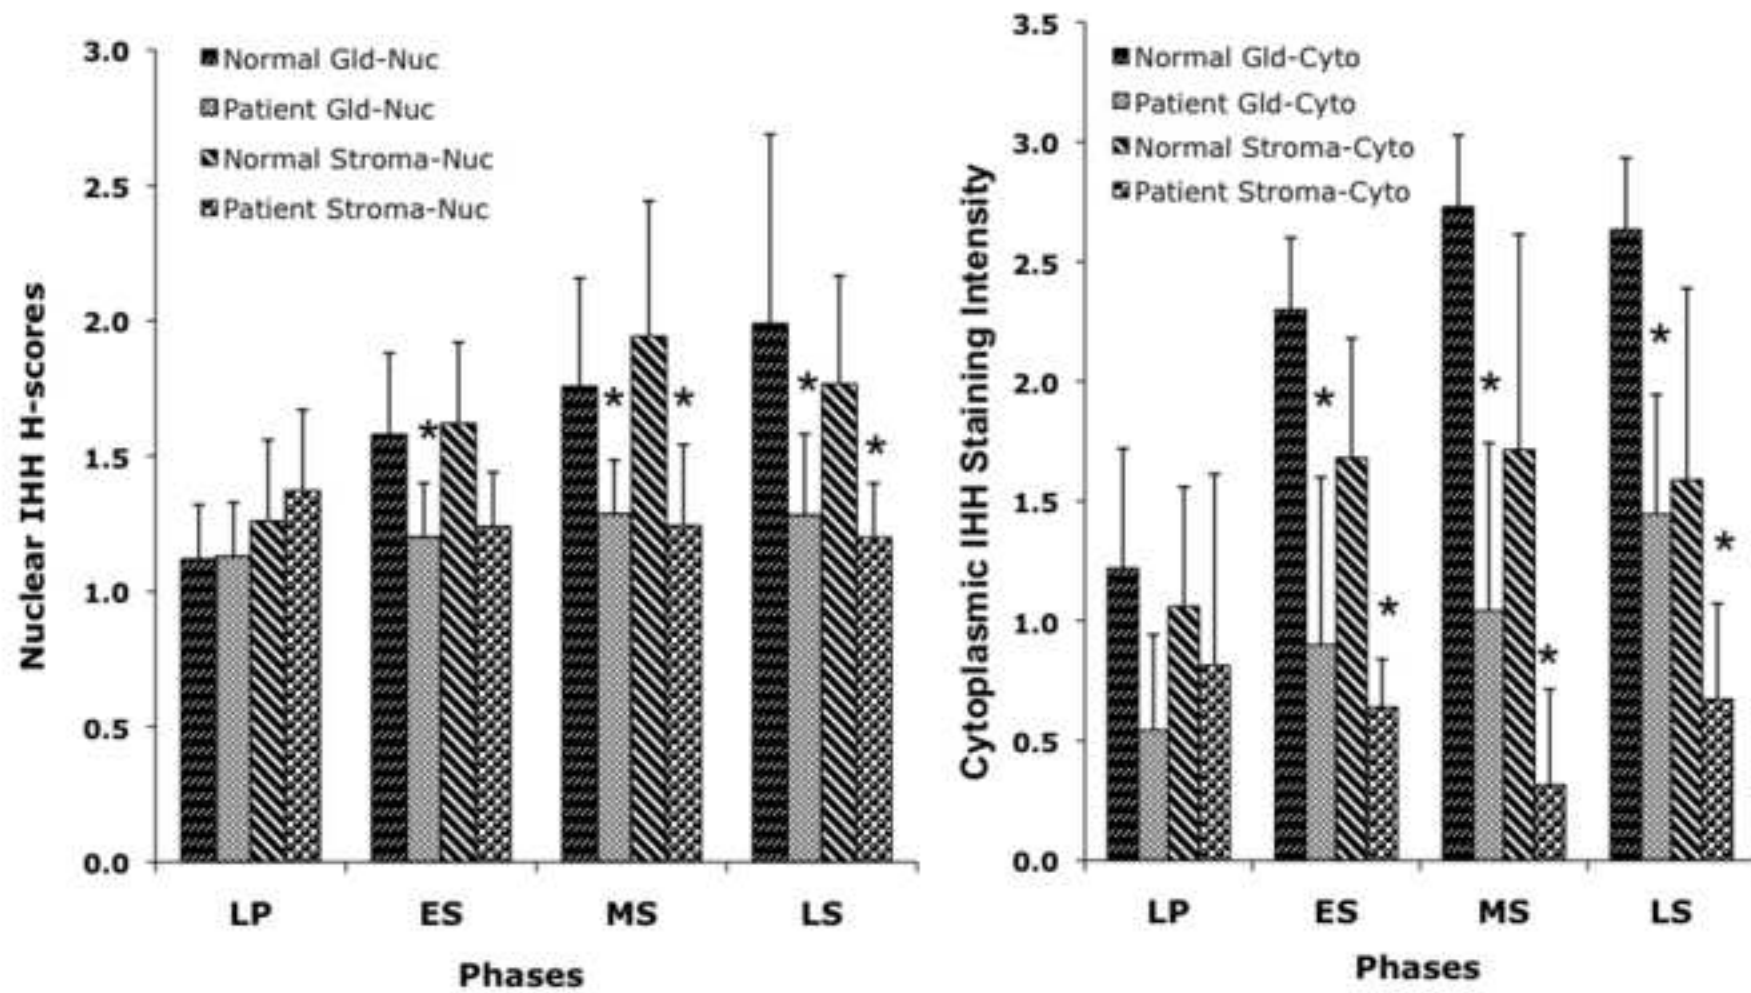

Supplemental Table. Distribution of r-AFS scores in women with endometriosis according to histologic dating of the endometrium.

|                    | I (n) | II (n) | III (n) | IV (n) |
|--------------------|-------|--------|---------|--------|
| Late proliferative | 2     | 2      | 2       | 1      |
| Early secretory    | 1     | 4      | 0       | 0      |
| Mid-secretory      | 3     | 2      | 1       | 1      |
| Late secretory     | 3     | 3      | 1       | 4      |
| Total              | 9     | 11     | 4       | 6      |

Table 1. Indian hedgehog expression in endometrium of healthy control women (N) and patients with endometriosis (P). Nuclear (nuc) and cytoplasmic (cyto) staining were assessed in the glands and stroma. LP = late proliferative, ES = early secretory, MS = mid-secretory, LS = late secretory, n = number per group

| Cycle phase | n  | H-score (mean $\pm$ SD) |                      |                         |                      | Staining Intensity (mean $\pm$ SD) |                      |                          |                      |
|-------------|----|-------------------------|----------------------|-------------------------|----------------------|------------------------------------|----------------------|--------------------------|----------------------|
|             |    | Gland-nuc <sup>a</sup>  | P <0.05 <sup>e</sup> | Stroma-nuc <sup>b</sup> | P <0.05 <sup>e</sup> | Gland-cyto <sup>c</sup>            | P <0.05 <sup>e</sup> | Stroma-cyto <sup>d</sup> | P <0.05 <sup>e</sup> |
| NLP         | 5  | 1.1 $\pm$ 0.2           | 0.0009               | 1.3 $\pm$ 0.3           |                      | 1.2 $\pm$ 0.5                      | < 0.001              | 1.1 $\pm$ 0.5            |                      |
| NES         | 5  | 1.6 $\pm$ 0.3           |                      | 1.6 $\pm$ 0.3           |                      | 2.3 $\pm$ 0.3                      |                      | 1.7 $\pm$ 0.5            |                      |
| NMS         | 7  | 1.8 $\pm$ 0.4           |                      | 1.9 $\pm$ 0.5           |                      | 2.7 $\pm$ 0.3                      |                      | 1.7 $\pm$ 0.9            |                      |
| NLS         | 9  | 2.0 $\pm$ 0.7           |                      | 1.8 $\pm$ 0.4           |                      | 2.6 $\pm$ 0.3                      |                      | 1.6 $\pm$ 0.8            |                      |
| PLP         | 7  | 1.1 $\pm$ 0.2           | 0.0002               | 1.4 $\pm$ 0.3           |                      | 0.5 $\pm$ 0.4                      | < 0.001              | 0.8 $\pm$ 0.8            |                      |
| PES         | 5  | 1.2 $\pm$ 0.2*          | 0.0029               | 1.2 $\pm$ 0.2           | 0.0366               | 0.9 $\pm$ 0.7*                     | < 0.001              | 0.6 $\pm$ 0.2*           | 0.0467               |
| PMS         | 8  | 1.3 $\pm$ 0.2*          | 0.0033               | 1.2 $\pm$ 0.3*          | 0.0172               | 1 $\pm$ 0.7*                       | < 0.001              | 0.3 $\pm$ 0.4*           | 0.0010               |
| PLS         | 11 | 1.3 $\pm$ 0.3*          | 0.0008               | 1.2 $\pm$ 0.2*          | 0.0025               | 1.4 $\pm$ 0.5*                     | < 0.001              | 0.7 $\pm$ 0.4*           | 0.0110               |

P value for Wilcoxon test among all above phases for each tissue compartment <sup>a</sup> 0.0007, <sup>b</sup>

0.0018, <sup>c</sup> <0.0001, <sup>d</sup> 0.0022

<sup>e</sup> Indicates p values < 0.05 by Dunnett's method using the NLS as a control group

\* Asterisks indicate significantly different expression in women with endometriosis compared to control women in the same phase of the cycle.

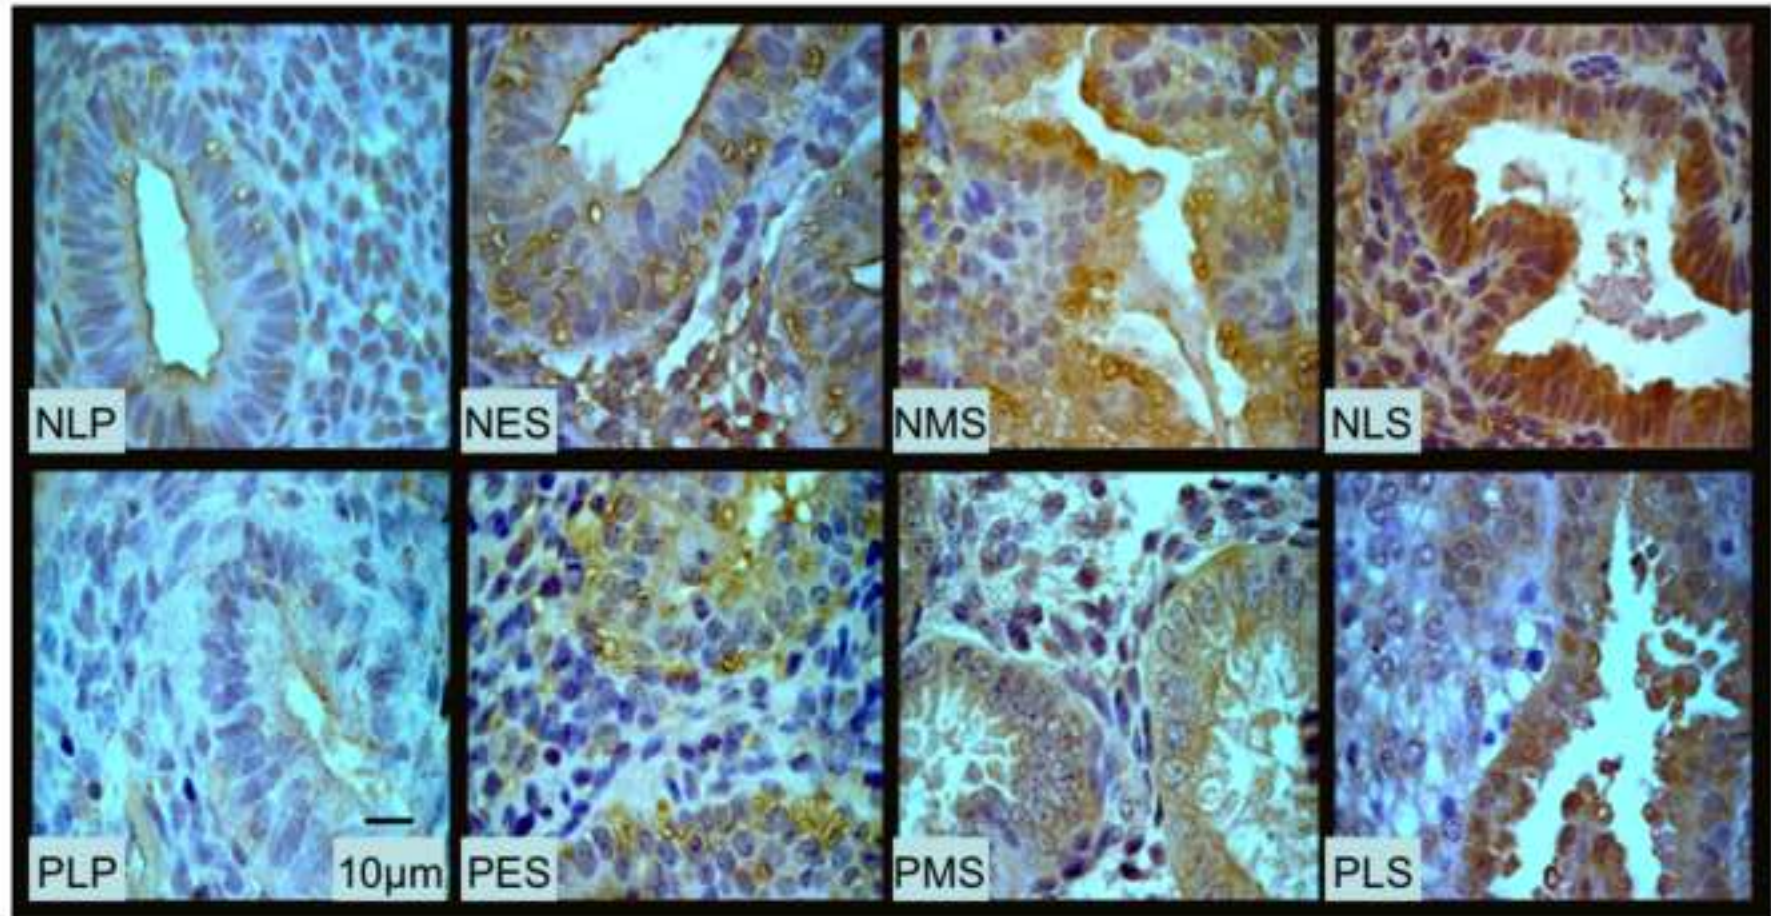

Supplement: NIHMS301214-supplement-supplement_1.pdf [file NIHMS301214-supplement-supplement_1.pdf]
